# Supplementary material for: A Comparative Evaluation of Public Road Transportation Systems in India Using Multicriteria Decision-Making Techniques
Source: Hindawi journal article supplement (doi:10.1155/2020/8827186), 2020-10-24
Supplement: f1 [file 8827186.f1.zip]

Archive with 2 entries (2 files):
- Appendix.docx
- Supplementary.xlsx
