# Supplementary material for: A Comparative Evaluation of Public Road Transportation Systems in India Using Multicriteria Decision-Making Techniques
Source: Hindawi journal article supplement (doi:10.1155/2020/8827186), 2020-10-24
Supplement: f1 [file 8827186.f1.zip › Appendix.docx]

# **Supplementary material for “A Comparative Evaluation of Public Road Transportation Systems in India using Multi-Criteria Decision-Making Techniques”**

**APPENDIX A**

## *DMUs and their web-links*

# **Table A1: DMUs and their weblinks**

| Sr No | DMU | Web-link |
| --- | --- | --- |
| 1 | Ahmedabad MTC | <http://www.amts.co.in/> |
| 2 | Andhra Pradesh SRTC | <http://www.apsrtconline.in/> |
| 3 | Andaman & Nicobar ST | <https://www.andaman.gov.in/> |
| 4 | Assam STC | <https://astc.assam.gov.in/> |
| 5 | BEST Undertaking | <http://www.bestundertaking.com/> |
| 6 | Bangalore Metropolitan TC | <http://www.mybmtc.com/> |
| 7 | Bihar SRTC | <http://bsrtc.org.in/> |
| 8 | Calcutta STC | <http://sbstc.co.in/> |
| 9 | Chandigarh TU | <http://chdtransport.gov.in/> |
| 10 | Delhi TC | <http://delhi.gov.in/wps/wcm/connect/DOIT_DTC/dtc/home/> |
| 11 | Gujarat SRTC | <http://www.gsrtc.in/> |
| 12 | Haryana ST | <http://hartrans.gov.in/> |
| 13 | J&K SRTC | <https://www.jksrtc.co.in/> |
| 14 | Kadamba TC Ltd. | <https://ktclgoa.com/> |
| 15 | Karnataka SRTC | <http://www.ksrtc.in/> |
| 16 | Kerala SRTC | <https://www.keralartc.com/> |
| 17 | Maharashtra SRTC(P) | <http://www.msrtc.gov.in/> |
| 18 | Meghalaya STC | <http://megtransport.gov.in/> |
| 19 | Metro TC (Chennai) Limited | <http://www.mtcbus.org/> |
| 20 | Mizoram ST | <https://transport.mizoram.gov.in/> |
| 21 | Nagaland ST | <http://mvd.nagaland.gov.in/> |
| 22 | Navi Mumbai MT | <https://www.nmmc.gov.in/nmmt> |
| 23 | North Bengal STC | <http://nbstc.co.in/> |
| 24 | North Eastern Karnataka RT | <https://www.nekrtc.in/English/> |
| 25 | North Western Karnataka RT | <https://www.nwkrtc.in/English/> |
| 26 | Odisha SRTC | [www.osrtc.in/](http://www.osrtc.in/) |
| 27 | Pune Mahamandal | <http://www.msrtc.gov.in/> |
| 28 | PUNBUS | <http://www.punbusonline.com/> |
| 29 | State Transport Punjab | <http://www.pepsurtc.gov.in/> |
| 30 | Rajasthan SRTC | <http://rsrtc.rajasthan.gov.in/> |
| 31 | Sikkim NT | <http://www.sntd.in/> |
| 32 | South Bengal STC | <http://sbstc.co.in/> |
| 33 | State Exp.TC TN Ltd. | <http://www.tnstc.in/> |
| 34 | Telangana SRTC | <https://www.tsrtc.telangana.gov.in/> |
| 35 | Thane MT | <http://thanecity.gov.in/department_details.php?id=34> |
| 36 | TN STC (Coimbatore) Ltd. | <http://www.tnstc.in/> |
| 37 | TN STC (Kumbakonam) Ltd. | <http://www.tnstc.in/> |
| 38 | TN STC (Madurai) Ltd. | <http://www.tnstc.in/> |
| 39 | TN STC (Salem) Ltd. | <http://www.tnstc.in/> |
| 40 | TN STC (Villupuram) Ltd. | <http://www.tnstc.in/> |
| 41 | Tripura RTC | <https://transport.tripura.gov.in/> |
| 42 | Uttar Pradesh SRTC (P) | <http://www.upsrtc.com/> |

# **APPENDIX B**

Following tables are provided in the attached excel file:

**Table B1:** Data for the year 2014-15 - *Sheet named “Table B1” in excel*

**Table B2:** Data for the year 2015-16 - *Sheet named “Table B2” in excel*

**Table B3:** Peers for the DMUs for different criteria heads (year 2014-15) - *Sheet named “Table B3” in excel*

**Table B4**: Peers for the DMUs for different criteria heads (year 2015-16) - *Sheet named “Table B4” in excel*

**APPENDIX C**

## ***Criteria for Evaluation***

The criteria considered for analysis were classified into 6 functional heads: Traffic revenue, Expenses, Vehicle Operations, Manpower, Maintenance, and Accident based. The various input and output criteria for different functional heads used in DEA are as follows:

***1. Criteria under Traffic Revenue***

Input Criteria:

- Average fleet held: Average number of buses held across the year
- Fuel efficiency: Average km performed per kg of CNG
- Staff strength: Average number of staff employed across the year
- Staff productivity: Average km performed per staff per day
- Vehicle productivity: Average km performed per bus per day
- Passenger kilometres offered: Average number of seats times km performed (in Lakh)
- Staff Cost: Total expenditure on staff (in Rs. Lakh)
- Population: Population of the region served
- Per Capita Income: Per capita income of the population residing in the region (in Rs.)
- Area: Area of the region serviced (in sq. km)

Output Criteria:

- Average fleet operated: Average number of buses operated across the year
- Passenger carried per bus/day: Average number of passengers carried in a single bus per day
- Traffic revenue: Revenue generated by running buses (in Rs. Lakh)

***2. Criteria under Expenses***

Input Criteria:

- Average fleet held: Average number of buses held across the year
- Average fleet operated: Average number of buses operated across the year
- Average age of fleet: Average age of buses (in years)
- Fuel efficiency: Average km performed per kg of CNG
- Staff strength: Average number of staff employed across the year
- Vehicle productivity: Average km performed per bus per day
- Passenger kilometres performed: Number of passenger times km performed (in Lakh)
- Population: Population of the region served
- Area: Area of the region serviced (in sq. km)

Output Criteria:

- Staff cost: Total expenditure on staff (in Rs. Lakh)
- Fuel and Lubricant cost: Total expenditure on fuel and lubricants (in Rs. Lakh)
- Cost of tyres and tubes: Total expenditure on tyres and tubes (in Rs. Lakh)
- Cost of spares: Total expenditure on spare parts (in Rs. Lakh)

***3. Criteria under Vehicle Operations***

Input Criteria:

- Average fleet held: Average number of buses held across the year
- Passenger kilometres offered: Average number of seats times km performed (in Lakh)
- Population: Population of the region served
- Per Capita Income: Per capita income of the population residing in the region (in Rs.)
- Area: Area of the region serviced (in sq. km)

Output Criteria:

- Average fleet operated: Average number of buses operated across the year
- Average age of fleet: Average age of buses (in years)
- Vehicle productivity: Average km performed per bus per day
- Passenger kilometres performed: Number of passengers times km performed (in Lakh)
- Passenger carried: Number of passengers carried across the year (in Lakh)
- Passenger carried per bus/day: Average number of passengers carried in a single bus per day

***4. Criteria under Manpower***

Input Criteria:

- Average fleet operated: Average number of buses operated across the year
- Staff strength: Average number of staff employed across the year
- Staff cost: Total expenditure on staff (in Rs. Lakh)
- Population: Population of the region served
- Per Capita Income: Per capita income of the population residing in the region (in Rs.)
- Area: Area of the region serviced (in sq. km)

Output Criteria:

- Staff productivity: Average kms performed per staff per day
- Passenger carried: Number of passengers carried across the year (in Lakh)
- Passenger carried per bus/day: Average number of passengers carried in a single bus per day

***5. Criteria under Maintenance***

Input Criteria:

- Average fleet held: Average number of buses held across the year
- Average fleet operated: Average number of buses operated across the year
- Average age of fleet: Average age of buses (in years)

Output Criteria:

- Staff cost: Total expenditure on staff (in Rs. Lakh)
- Cost of tyres and tubes: Total expenditure on tyres and tubes (in Rs. Lakh)
- Cost of spares: Total expenditure on spare parts (in Rs. Lakh)

***6. Criteria under Accident***

Input Criteria:

- Average fleet held: Average number of buses held across the year
- Average fleet operated: Average number of buses operated across the year
- Average age of fleet: Average age of buses (in years)
- Population: Population of the region served
- Per Capita Income: Per capita income of the population residing in the region (in Rs.)
- Area: Area of the region serviced (in sq. km)

Output Criteria:

- Number of accidents: Total number of accidents (major/minor) across the year
- Number of fatal accidents: Total number of fatal accidents across the year
