# Supplementary material for: A Comparative Evaluation of Public Road Transportation Systems in India Using Multicriteria Decision-Making Techniques
Source: Hindawi journal article supplement (doi:10.1155/2020/8827186), 2020-10-24
Supplement: f1 [file 8827186.f1.zip › Supplementary.xlsx]

## Sheet: Table B1
Following are the acronyms for the criteria used in the data table:
AFH: Average Fleet Held (Number)			AFO: Average Fleet Operated (Number)
AAF: Average Age of Fleet (Years)			FE: Fuel Efficiency (Kms/litre of HSD)
SS: Staff Strength (Number)			SP: Staff Productivity (Kms/Staff/Day)
VP: Vehicle Productivity (Kms/Bus/Day)			PKO: Passenger Kilometres Offered (Lakh)
PKP: Passenger Kilometres Performed (Lakh)			PC: Passenger Carried (Lakh)
PCBD: Passenger Carried per Bus/Day (Number)			TR: Traffic Revenue (Rs. Lakh)
SC: Staff Cost (Rs. Lakh)			FLC: Fuel and Lubricant Cost (Rs. Lakh)
CTT: Cost of Tyres and Tubes (Rs. Lakh)			CS: Cost of Spares (Rs. Lakh)
NPL: Net Profit/Loss (Rs. Lakh)			PBT: Profit Before Tax (Rs. Lakh)
NA: Number of Accidents			NFA: Number of Fatal Accidents
P: Population (Number)			PCI: Per capita income (Rs.)
A: Area (in sq. km)
DMU	AFH	AFO	AAF	FE	SS	SP	VP	PKO	PKP	PC	PCBD	TR	SC	FLC	CTT	CS	NPL	PBT	NA	NFA	P	PCI	A
Ahmedabad MTC	946	719	5	3.2	5503	26.5	154	28032	15852	2024	586	11959	17464	3692	274	548	-24656	-24527	435	14	8693960	130000	464
Andhra Pradesh SRTC	12079	12023	5.7	5.2	61806	73	373	786515	548032	23192	526	342810	180307	130224	8367	13130	-44056	-12131	1320	467	51489034	93903	160205
Andaman & Nicobar	266	255	8.2	3.8	858	33.4	108	106	105	101	104	1468	1774	1653	142	242	-3492	-3340	7	1	390816	119291	8250
Assam STC	815	570	3.5	3.7	3148	25.1	97	9621	7065	149	50	7100	7485	4467	314	380	-4678	-4653	50	5	33236109	52895	78438
BEST Undertaking	4247	3636	8.4	2.8	35705	18.7	157	160925	90716	12216	788	125444	158238	42798	1926	7215	-85802	-82729	511	24	2989800	388894	603
Bangalore Metropolitan	6649	6014	6	3.8	36474	35.4	194	292401	217254	19367	798	199411	101777	77073	3136	6289	-6490	4617	388	71	11230224	285164	709
Bihar SRTC	223	86	11.9	4.3	749	22.9	77	3004	2673	25	31	1197	972	752	131	83	-8921	-8900	1	0	113972403	28671	99200
Calcutta STC	813	454	3.6	2.1	4998	15.5	95	9576	7653	869	293	10205	18504	11330	94	224	-7427	-7427	308	13	4466578	124385	205
Chandigarh TU	432	378	6.4	3.5	2102	43.8	213	16784	15441	478	303	9474	8702	5165	250	890	-6960	-6120	111	4	1124587	212785	114
Delhi TC	4977	4180	6.7	2.3	32864	23.9	158	169388	110187	14187	781	98705	132959	46502	280	1311	-291776	-289973	178	38	18130515	249589	1484
Gujarat SRTC	7765	6683	4.8	5.5	39257	73.7	373	521185	333368	7735	273	206892	108807	117546	7148	3236	-13350	12729	642	160	64855572	127017	196024
Haryana ST	4083	3708	3.4	4.8	18259	70.1	313	233451	169225	4683	314	128840	87171	55693	3042	4188	-59781	-33268	259	125	27259929	147382	44212
J&K SRTC	610	287	10.4	4.2	1720	28.5	80	181	179	46	21	5885	5291	2237	159	186	-84	821	27	4	13652152	61213	222236
Kadamba TC Ltd.	540	361	5	4.4	2054	41	156	17513	9468	344	175	7201	8791	4363	312	322	-1826	-1590	75	8	1505409	289185	3702
Karnataka SRTC	8321	7572	4.2	4.8	37326	72.5	325	507866	354490	10349	341	283987	113882	127100	8478	10001	-4349	11443	1207	272	64742736	130024	191791
Kerala SRTC	5691	4609	7	4.2	40812	37.2	267	6981	5537	11059	532	196455	123190	87474	2854	6966	-71948	-63143	1077	159	34053257	135537	38863
Maharashtra SRTC(P)	17957	16702	4.6	4.8	107500	53.1	318	916294	649286	24557	375	572744	306251	271128	19181	9667	-39101	68814	3172	418	119245717	132476	307713
Meghalaya STC	63	42	5.6	4.5	286	21.6	98	632	399	4	17	419	769	287	24	27	-181	-172	0	0	3274273	64638	22720
Metro TC Chennai Ltd	3787	3187	6	4.4	25219	38.2	254	249542	189963	18120	1311	108718	90313	47672	3002	5861	-39268	-37721	1611	107	4047983	372460	426
Mizoram ST	33	18	6	3.2	418	6.6	83	261	229	0	4	231	2172	129	24	59	-2152	-2152	0	0	1193785	103049	21081
Nagaland ST	193	125	5.9	3.9	1050	15.7	85	2104	1388	16	22	1379	3656	810	207	274	-4059	-4017	0	0	1973907	78367	16579
Navi Mumbai MT	360	243	5	3.1	2491	27	187	323	246	801	610	9153	6543	4766	143	322	-1472	-1177	141	2	1349499	114845	109
North Bengal STC	661	501	6.2	4.1	2370	43.7	157	18904	13800	764	317	8400	12829	5967	310	432	-2113	-2112	62	15	18127213	82097	17617
North East Karnataka	4320	3795	5.7	5.2	18412	67.7	288	231970	153146	4891	310	129622	58516	55279	4472	2900	-1512	5250	446	127	14192101	135472	54538
North West Karnataka	4738	4507	5.7	5.2	23573	66.6	332	292426	179303	8304	480	151278	66470	66963	4131	3551	-5308	2164	539	138	13369019	163733	44020
Odisha SRTC	446	339	4.9	4.7	606	141.5	192	24788	19949	64	39	7664	2014	4151	372	322	503	989	30	7	44239941	63169	155707
Pune Mahamandal	2087	1364	8.1	3.2	10186	30.8	151	64749	49400	4444	583	55940	43935	10280	589	1116	-16769	-16630	35	12	13619892	189492	331
PUNBUS	1242	1242	7	4.5	2837	128.2	293	1458	1327	919	203	35446	10954	18523	1109	498	241	7476	50	16	29225263	108970	50362
State Transport Punjab	376	376	7	4.6	4252	19.1	215	387	296	104	76	14212	20633	3776	260	567	-11219	-9607	0	0	29225263	108970	50362
Rajasthan SRTC	4704	4324	4.2	5	20551	83.5	365	306849	223386	3582	209	154874	110656	72737	5505	2991	-55864	-34602	365	144	74055122	76429	342239
Sikkim NT	85	65	10	3.3	774	5.9	54	1390	460	13	41	1025	3391	590	32	99	-1021	-1021	0	0	640923	214148	7096
South Bengal STC	590	403	5.1	4.1	2148	45.7	166	17904	11783	49	23	9482	8302	5976	335	577	-4932	-4393	38	5	73271783	95333	71135
State Exp.TC TN Ltd.	1104	1012	4.1	5.2	6997	87.2	552	91272	77552	271	67	53882	28888	25410	1425	1381	-19566	-14274	354	70	76456814	128372	130060
Telangana SRTC	10329	10314	6.3	5.1	56740	60.1	330	632306	436291	33391	886	329793	178300	131986	8128	5708	-40142	-10615	968	380	36692071	124104	112077
Thane MT	338	174	3.2	2.8	2250	15.3	102	7798	4403	626	507	6827	7381	3099	90	695	-4946	-4440	75	4	12508050	191163	147
TN STC Coimbatore Ltd.	3184	3061	5.9	5.2	18964	66.3	395	331952	228832	9015	776	100173	69862	52221	1976	4467	-34786	-30602	743	161	4880747	94231	247
TN STC Kumbakonam Ltd.	3783	3622	5.8	5.6	23198	72.6	445	384399	333661	14272	1034	133684	94767	65792	4236	2715	-39096	-32434	955	250	7100800	57824	13
TN STC (Madurai) Ltd.	2516	2381	5.5	5.4	14850	70.7	417	261289	187391	6564	715	83816	63693	43007	2527	1787	-29686	-26082	562	144	4401020	80945	148
TN STC Salem Ltd.	2230	2061	6.6	5.5	7444	136.7	456	236920	153058	5582	686	76310	48011	40156	1479	1963	-13516	-8855	271	132	6430027	69909	124
TN STC Villupuram	3528	3352	5.7	5.6	22573	73.3	469	375975	293360	8450	656	132184	84123	64459	3627	3696	-33419	-29275	1091	200	14540823	43234	4194
Tripura RTC	48	31	7	5.1	396	0.9	7	1	1	2	10	164	1372	103	18	33	-61	-59	0	0	3882973	69474	10492
Uttar Pradesh SRTC (P)	9415	9128	4.4	5.2	24913	127.2	337	387745	283054	5440	158	323469	108391	101360	6720	8398	396	35652	719	315	215090385	42267	243286

## Sheet: Table B2
Following are the acronyms for the criteria used in the data table:
AFH: Average Fleet Held (Number)			AFO: Average Fleet Operated (Number)
AAF: Average Age of Fleet (Years)			FE: Fuel Efficiency (Kms/litre of HSD)
SS: Staff Strength (Number)			SP: Staff Productivity (Kms/Staff/Day)
VP: Vehicle Productivity (Kms/Bus/Day)			PKO: Passenger Kilometres Offered (Lakh)
PKP: Passenger Kilometres Performed (Lakh)			PC: Passenger Carried (Lakh)
PCBD: Passenger Carried per Bus/Day (Number)			TR: Traffic Revenue (Rs. Lakh)
SC: Staff Cost (Rs. Lakh)			FLC: Fuel and Lubricant Cost (Rs. Lakh)
CTT: Cost of Tyres and Tubes (Rs. Lakh)			CS: Cost of Spares (Rs. Lakh)
NPL: Net Profit/Loss (Rs. Lakh)			PBT: Profit Before Tax (Rs. Lakh)
NA: Number of Accidents			NFA: Number of Fatal Accidents
P: Population (Number)			PCI: Per capita income (Rs.)
A: Area (in sq. km)
DMU	AFH	AFO	AAF	FE	SS	SP	VP	PKO	PKP	PC	PCBD	TR	SC	FLC	CTT	CS	NPL	PBT	NA	NFA	P	PCI	A
Ahmedabad MTC	993	804	3.2	3.3	5498	28.8	160	28284	17902	2275	626	11189	18683	3009	235	693	-27651	-26797	715	19	9109082	142524	464
Andhra Pradesh SRTC	12012	11931	6.2	5.2	57902	76.6	369	777454	516979	22977	523	427160	258587	134785	9092	13854	-54903	-15020	1108	409	52028429	108002	160205
Andaman & Nicobar ST	268	247	7.3	3.7	858	33.7	108	108	106	115	117	1745	2639	1813	135	175	-4202	-4029	3	1	393417	126995	8250
Assam STC	1090	668	4.4	3.8	3987	20.6	75	9944	7438	208	52	7300	7997	3945	184	191	-4159	-4117	31	6	33764060	60817	78438
BEST Undertaking	4094	3466	9.1	2.8	34174	18.7	156	153161	73490	10611	708	134902	168916	39503	1783	7450	-106192	-99844	465	29	2966363	429353	603
Bangalore Metropolitan	6448	5856	6.9	3.8	35554	25.8	142	208705	156478	14430	611	191803	109581	60735	3113	7414	1373	12064	252	46	11672779	324826	709
Bihar SRTC	223	94	12.9	4.3	625	32.6	91	3570	3146	27	33	1589	1092	820	95	131	-8750	-8664	4	0	116583616	30404	99200
Calcutta STC	782	401	3.4	2.6	4799	11.8	73	11029	6306	616	215	6990	18085	4904	187	174	-12616	-12616	176	5	4459080	137235	205
Chandigarh TU	494	421	7.8	3.7	1967	54.9	218	17769	15795	539	298	10937	8689	4729	213	1006	-7114	-5983	154	6	1142568	230459	114
Delhi TC	4564	3817	7.1	2.3	30527	23.9	160	157737	105794	12944	775	91042	147469	40791	150	1094	-341110	-339223	155	32	18482611	273301	1484
Gujarat SRTC	7852	6587	5.3	5.5	39707	73.4	371	527888	326306	7613	265	195009	112634	97438	5834	3928	-24792	-3132	569	164	66009061	139254	196024
Haryana ST	4170	3747	4.1	4.7	17646	71.1	301	229464	172764	4554	298	131367	92565	47239	3038	4705	-57717	-30247	263	123	27759085	164868	44212
J&K SRTC	610	266	10	4.3	1989	23.6	77	175	173	46	21	5550	5421	2076	166	206	-311	553	19	2	13944911	73215	222236
Kadamba TC Ltd.	569	361	5.5	4.2	2003	42.2	149	17634	9799	356	171	7416	9723	3650	291	371	520	753	70	4	1517359	334576	3702
Karnataka SRTC	8172	7401	4.9	4.8	37129	71.3	324	497734	343937	10104	338	277773	131416	102022	6929	10098	5095	20512	1100	271	65688125	148108	191791
Kerala SRTC	5636	4523	6.4	4.2	42240	35.5	266	7109	5489	10437	506	213823	123786	91327	2892	9671	-73877	-65814	1421	193	34217006	148133	38863
Maharashtra SRTC(P)	18514	16981	4.8	4.8	105679	54.5	311	918189	639059	24561	362	571389	316853	231014	14578	10798	-24243	79577	2920	369	121028236	146258	307713
Meghalaya STC	59	46	6.8	4.8	270	26.5	121	710	459	4	17	481	933	301	21	36	-354	-349	0	0	3355971	68836	22720
Metro TC Chennai Ltd	3832	3237	6.6	4.4	24930	38.7	252	250415	190868	17815	1270	107306	111131	39072	2842	5720	-49967	-48608	1551	114	3910763	407477	426
Mizoram ST	49	23	6	3.3	396	4.2	34	158	183	0	2	185	1978	120	21	43	-1977	-1977	0	0	1219230	114055	21081
Nagaland ST	185	115	8.3	3.5	1050	15.8	90	2129	1435	12	17	1124	3818	825	340	211	-4811	-4758	0	0	1972760	82466	16579
Navi Mumbai MT	375	257	4.5	2.9	2569	28.1	192	330	264	844	615	10483	6950	4763	203	366	-3189	-2836	151	5	1413703	126793	109
North Bengal STC	779	632	6.5	4.1	2172	70.3	196	24035	18267	1125	395	12373	14292	7325	453	738	-1993	-1726	113	33	18363785	90578	17617
North East Karnataka	4447	3984	6.1	5.2	20341	64.6	295	250085	158481	4923	302	132411	73716	47759	4178	3056	-2192	4713	404	118	14399338	154314	54538
North West Karnataka	4736	4558	6.6	5.2	23586	67.6	337	297770	178564	8272	477	150655	72278	56740	3557	3692	-3878	3547	499	142	13564237	186506	44020
Odisha SRTC	459	372	5.7	4.7	570	158.2	197	21003	15122	70	41	7675	2276	3801	397	405	500	1017	27	6	44825229	64595	155707
Pune Mahamandal	2075	1447	8.2	3.3	9945	31.5	151	62856	49498	4115	542	63066	48886	8674	710	1955	-15181	-14596	50	12	14931244	209206	331
PUNBUS	1258	1258	7	4.6	3500	110	306	1488	1409	1664	361	36594	12200	16046	641	934	574	7836	94	16	29607951	118858	50362
State Transport Punjab	484	484	7	4.5	3834	24.2	192	404	340	84	47	8595	14197	4153	260	440	-10065	-8387	1	0	29607951	118858	50362
Rajasthan SRTC	4529	4013	5	5	19163	84.2	356	289216	218069	3388	204	151840	113172	55468	4256	3156	-50566	-28834	322	129	75499572	83427	342239
Sikkim NT	126	104	8	3.3	723	7.2	41	588	417	14	30	1758	3556	806	43	140	-715	-698	0	0	648742	245987	7096
South Bengal STC	662	465	5.4	4.2	2127	57.5	185	22376	16585	63	26	10859	8134	5897	488	618	-4097	-3312	61	15	74228029	105182	71135
State Exp.TC TN Ltd.	1169	1053	4.1	5.2	6811	93.7	546	97301	78728	269	63	55067	29682	21851	1205	1454	-15707	-9959	335	77	77573901	140441	130060
Telangana SRTC	10391	10379	7.1	5.1	55993	60.4	326	620308	435518	32936	866	329630	239888	105206	7240	6386	-70182	-45282	827	348	37076454	140840	112077
Thane MT	353	184	4.2	2.8	2186	16.4	101	7987	4781	575	445	7660	6897	2199	144	459	-1900	-1860	59	3	12898724	211051	147
TN STC Coimbatore Ltd.	3249	3166	6.1	5.2	19647	67.7	409	346989	236591	9323	784	103247	75547	45834	1847	4615	-36522	-32114	983	177	5319860	103090	247
TN STC Kumbakonam	3820	3662	6.3	5.6	23613	73.8	456	399659	343024	14414	1031	135696	106468	56448	4191	3670	-38862	-32345	982	240	9307117	63261	13
TN STC Madurai Ltd.	2540	2459	5.8	5.4	15061	72.7	431	272306	192065	6407	689	85458	67984	37109	2445	1892	-27401	-23775	551	152	4828205	88555	148
TN STC (Salem) Ltd.	2309	2061	6.8	5.6	13760	78.3	467	250877	156567	5533	655	78470	56465	35029	1318	2142	-24227	-19260	304	162	7495611	76481	124
TN STC Villupuram Ltd.	3590	3442	6.2	5.6	22417	78.5	490	399190	298710	8420	641	134573	92754	56352	3653	3858	-30492	-26293	1085	230	20821048	47299	4194
Tripura RTC	48	16	8	5.3	353	1	8	1	1	2	11	172	1706	107	16	33	-39	-31	0	0	3937070	83680	10492
Uttar Pradesh SRTC(P)	9577	9269	5.1	5.2	23055	140.4	338	573484	407174	5560	159	332575	127246	89370	6131	8856	927	37474	630	339	219089048	47062	243286

## Sheet: Table B3
Following are the acronyms used in the table:
A: Accident
T: Traffic Revenue
E: Expenses
V: Vehicle Operations
M: Maintenance
MP: Manpower
		Serial number of Peer DMU
S No	DMUs	3	4	6	8	16	18	19	20	22	26	28	34	35	37	39	40
1	Ahmedabad MTC	V		V	A, E	V		MP	E	A, E, V, MP			MP	E, M	MP	A, V	A
2	Andhra Pradesh SRTC		A		A								MP	A, E, M	MP
3	Andaman & Nicobar ST	A, E, T, V, MP					M							M
4	Assam STC		A, T		E	V				MP	MP	V		E, M	V	MP
5	BEST Undertaking				A, E			MP		A, E				M
6	Bangalore Metropolitan TC			T, V, MP	A, E									A, E, M
7	Bihar SRTC	T					MP		E, M	T, MP	T, MP	T		M
8	Calcutta STC				A, E, T, V			MP		MP	MP			M		MP
9	Chandigarh TU						M							M
10	Delhi TC		A		A, E			MP						A, M	MP
11	Gujarat SRTC		A								MP	T, V	T, V, MP	A, E, M	V, MP
12	Haryana ST		A	T, V		T		MP			MP	V	V, MP	A, E, M	V, MP	T, MP
13	J&K SRTC	E					A, MP		E, M		MP			M		MP	A
14	Kadamba TC Ltd.	T, V, MP		T, V	A		MP			A			V	M		T
15	Karnataka SRTC		A			V				MP	MP	V	V, MP	A, E, M	V, MP
16	Kerala SRTC		A		A, E	T, V		MP		E				M	MP		A
17	Maharashtra SRTC(P)		A										MP	A, E, M	MP
18	Meghalaya STC	T					A, E, M, V, MP			T		T
19	Metro TC (Chennai) Limited				A, E			T, V, MP		A, E				M
20	Mizoram ST	T, MP					MP		A, E, M, V			T
21	Nagaland ST	T, V, MP			E	T	M, V, MP		E	E		T	T	E, M	V	V, MP
22	Navi Mumbai MT						M			A, E, T, V, MP				M
23	North Bengal STC				A, E		A		E	T, MP	MP	T, MP		E, M, T		MP	A
24	North Eastern Karnataka RT	V	A	V	A, E	V	A	MP		V	MP		V, MP	E, M		MP
25	North Western Karnataka RT	V	A	V	A, E		A	MP		V	MP		V, MP	E, M		MP
26	Odisha SRTC		A				A, M, V				E, T, MP	V		A, M	V
27	Pune Mahamandal				A, E			MP		A, MP	MP			M	MP	A, MP	A
28	PUNBUS		A		A		A, E		E	E		T, V, MP		E, M			A
29	State Transport Punjab		A				A, M		E	E, MP	MP	MP		A, M
30	Rajasthan SRTC		A								MP	V	T	A, E, M	V	MP	T, MP
31	Sikkim NT	T, MP				T	M, MP		M	T, MP		T	T
32	South Bengal STC		A				A		E	MP	E, MP	T, V, MP	T	A, E, M	V
33	State Exp.TC TN Ltd.		A							MP	MP	MP		A, E, M
34	Telangana SRTC		A		A, E		A						T, V, MP	E, M
35	Thane MT													A, E, M, T, V, MP
36	TN STC (Coimbatore) Ltd.				A, E		A	MP		E				E, M	A, MP	MP
37	TN STC (Kumbakonam) Ltd.													M	A, E, T, V, MP
38	TN STC (Madurai) Ltd.				E					E				E, M
39	TN STC (Salem) Ltd.									E				E, M	E	A, T, V, MP
40	TN STC (Villupuram) Ltd.				E									E, M			A, T, V, MP
41	Tripura RTC						M, MP		M					MP
42	Uttar Pradesh SRTC (P)													E, M

## Sheet: Table B4
Following are the acronyms used in the table:
A: Accident
T: Traffic Revenue
E: Expenses
V: Vehicle Operations
M: Maintenance
MP: Manpower
		Serial number of Peer DMUs
S No	DMUs	1	3	4	6	8	16	18	19	20	22	26	28	34	35	37
1	Ahmedabad MTC	A,E,M,T			V		V		MP		V, MP					MP,V
2	Andhra Pradesh SRTC	A,E,M		A		E								MP		MP
3	Andaman & Nicobar ST		A,E, MP,T,V							M					M
4	Assam STC	M		A,T		E,M	V			E	MP	MP	V		E	MP,V
5	BEST Undertaking	M				A,E			MP		A,E
6	Bangalore Metropolitan TC	A,M			T,V	A,E			MP					MP		MP
7	Bihar SRTC		T					MP		E,M	MP,T	MP,T	T		E,M
8	Calcutta STC				T,V	A,E,M	T,V		MP		MP,T,V					MP,V
9	Chandigarh TU									M					M
10	Delhi TC	M		A		A			MP							MP
11	Gujarat SRTC	A,E,M							MP			MP	V	V		MP,V
12	Haryana ST	A,E,M	MP	A	V		V						V	V		MP,V
13	J&K SRTC		E					A,MP		E,M		MP			M
14	Kadamba TC Ltd.		A,E,T,V		T,V	M		MP		E	A,E,T		V	V	E,M
15	Karnataka SRTC	A,E,M				E	V		MP			MP	V	V		MP,V
16	Kerala SRTC	A,M		A		A,E	T,V		MP		E			MP		MP
17	Maharashtra SRTC(P)	A,E,M		A		E								MP		MP
18	Meghalaya STC							A,E,MP,V		M	T		T		M
19	Metro TC Chennai Ltd	M				A,E			MP,T,V		A,E
20	Mizoram ST									A,E,M,V
21	Nagaland ST		MP,T		T			MP		E,M	E		T	T	E,M
22	Navi Mumbai MT									M	A,E,MP,T,V				M
23	North Bengal STC			A		A,M		A		E		E			E,M
24	North East Karnataka	E,M	MP,T,V	A	T,V	A,E	V	A			V	MP	T	V		MP
25	North West Karnataka	E,M	MP,V	A	V	A,E		A	MP		V	MP		V		MP
26	Odisha SRTC									M		A,E,MP,T,V			M
27	Pune Mahamandal	M				A,E,M			MP		A,MP					A,MP
28	PUNBUS			A		A,M		A		E	E		MP,T,V		E,M
29	State Tran- sport Punjab			A		E		A		E,M	A,E	A,MP			M
30	Rajasthan SRTC	A,E,M		A		E	T,V				T	MP	V			MP,T,V
31	Sikkim NT		MP,T		T		T,V	MP		M	MP,T		T		M
32	South Bengal STC			A		M		V			A	A,E,MP	T,V		E,M	V
33	State Exp. TC TN Ltd.	A,E,M		A		A,E,M						MP
34	Telangana SRTC	M		A		A,E		A						MP,T,V
35	Thane MT										V				A,E,MMP,T	V
36	TN STC Coim- batore Ltd.	M				E		A			A,E					A
37	TN STC Ku-mbakonam Ltd.	M														A,E,MP,T,V
38	TN STC Madurai Ltd.	M									E
39	TN STC Salem Ltd.	M									E					E
40	TN STC Vi-llupuram Ltd.	E,M				E
41	Tripura RTC							M			M
42	Uttar Pradesh SRTC (P)	E,M				E
